# Supplementary material
Source: PubMed Central journal article supplement (PMC3346603)
Supplement: supp_56.5.2719_AAC6079-11_SF1.pdf [file supp_56.5.2719_AAC6079-11_SF1.pdf]

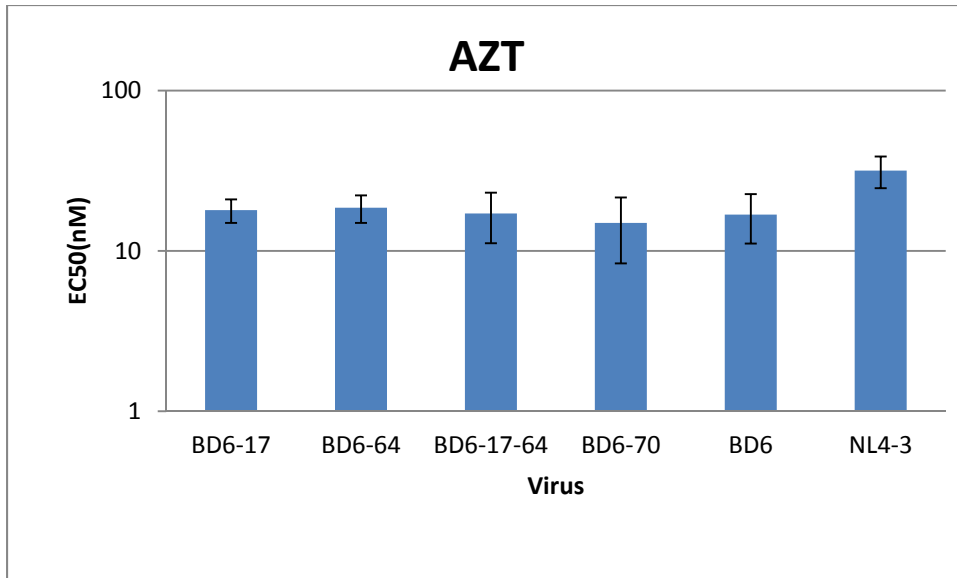

Supplementary figure 1: Susceptibility of BD6 and its derivative mutant viruses to AZT. NL4-3 is shown as a susceptible reference virus. All EC<sub>50</sub> values were derived from drug susceptibility assays performed in triplicate with each drug and each virus.
