# Supplementary material
Source: PubMed Central journal article supplement (PMC3346603)
Supplement: supp_56.5.2719_AAC6079-11_ST1-ST2.pdf [file supp_56.5.2719_AAC6079-11_ST1-ST2.pdf]

1 **Supplementary Table 1.** Primers used in the site-directed mutageneses

| <b>Mutation</b> | <b>Primer</b> | <b>Sequence (5'→3')</b>                         |
|-----------------|---------------|-------------------------------------------------|
| <b>G16E</b>     | Forward       | cttagttacagtaaaattagaggacagctgatagaagcc         |
|                 | Reverse       | ggcttctatcagctgtccctctaattttactgtaactaag        |
| <b>G17E</b>     | Forward       | cttagttacagtaaaattaggggaacagctgatagaagcc        |
|                 | Reverse       | ggcttctatcagctgtccctctaattttactgtaactaag        |
| <b>I64M</b>     | Forward       | gacaatatgatcagatacttatggaaatttgaggaaaaaggc      |
|                 | Reverse       | gcctttttccacaaattccataagtatctgatcatattgtc       |
| <b>K70R</b>     | Forward       | cttatagaaatttgaggaaaaaggctataggtacagtgttagtagg  |
|                 | Reverse       | cctactaacactgtacctatagccctttttccacaaatttctataag |
| <b>I72V</b>     | Forward       | gaaatttgaggaaaaaggctgtaggtacagtgttagtagg        |
|                 | Reverse       | cctactaacactgtacctacagcctttttccacaaatttc        |

2 \* Underlined bases correspond to the changes made to the original BD6-15 clone.

**Supplementary Table 2.** Primers used in the oligonucleotide ligation assays

| <b>Protease codon</b> | <b>Upstream primer</b>               | <b>Target</b> | <b>Downstream primer</b>   |
|-----------------------|--------------------------------------|---------------|----------------------------|
| <b>17</b>             | 5'-GTTACAGTAAAATTAGGGGA <u>A</u> -3' | 17E           | 5'-CAGCTGATAGAAGCCTTAT-3'  |
|                       | 5'-GTTACAGTAAAATTAGGGGG <u>G</u> -3' | 17G           |                            |
| <b>64</b>             | 5'-AATATGATCAGATACTTAT <u>G</u> -3'  | 64M           | 5'-GAAATTTGTGGAAAAAAGGC-3' |
|                       | 5'-AATATGATCAGATACTTATA <u>A</u> -3' | 64I           |                            |
| <b>72</b>             | 5'-AATTTGTGGAAAAAAGGCT <u>G</u> -3'  | 72V           | 5'-TAGGTACAGTGTTAGTAGGA-3' |
|                       | 5'-AATTTGTGGAAAAAAGGCT <u>A</u> -3'  | 72I           |                            |

\* Underlined bases correspond to the discriminating nucleotide position between the two variants present in each head-to-head competition.
